# Supplementary material for: Silver nanoparticles from hydrogen-bonded supramolecular scaffolds
Source: Royal Society of Chemistry journal article supplement (doi:10.1039/b808561g), 2008-01-01
Supplement: b808561g.pdf [file b808561g.pdf]

## SUPPORTING INFORMATION

### Silver nanoparticles from hydrogen-bonded supramolecular scaffolds

Sachin Kinge, \* <sup>a</sup> Mercedes Crego-Calama\*<sup>a,b</sup> and David Reinhoudt<sup>a</sup>

Laboratory of Supramolecular Chemistry and Technology, MESA<sup>+</sup> Institute for Nanotechnology,  
University of Twente, P.O. Box 217, 7500 AE Enschede, The Netherlands.

‡ Present address: Stichting IMEC Nederland, PO Box 8550, 5605 KN, Eindhoven,  
The Netherlands.

\* Correspondence author E-mail: [Mercedes.CregoCalama@imec-nl.nl](mailto:Mercedes.CregoCalama@imec-nl.nl), Phone: +31(0)40 2774119.

Fax: +31(0)40 2746400

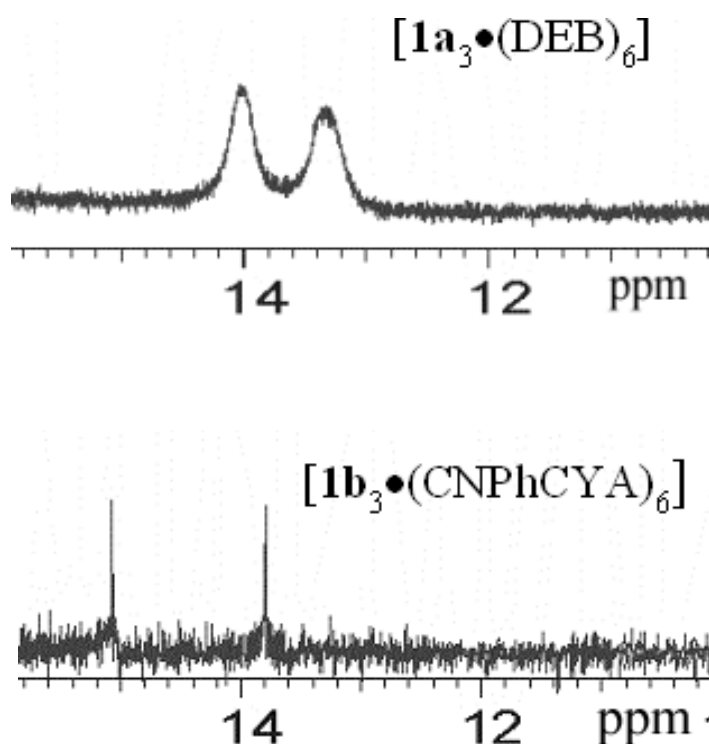

**Figure SI 1** <sup>1</sup>H NMR spectra of double rosette assemblies **1a<sub>3</sub>•(DEB)<sub>6</sub>** and **1b<sub>3</sub>•(CNPhCYA)<sub>6</sub>** recorded in [D]<sup>8</sup>-toluene at 300 MHz.
